# Supplementary material for: In situ spectroelectrochemical and theoretical study on the oxidation of a 4H-imidazole-ruthenium dye adsorbed on nanocrystalline TiO2thin film electrodes
Source: Royal Society of Chemistry journal article supplement (doi:10.1039/c5cp04484g), 2015-01-01
Supplement: c5cp04484g1.pdf [file c5cp04484g1.pdf]

## Electronic Supplementary Information

for

### ***In Situ* Spectroelectrochemical and Theoretical Study on the Oxidation of a 4*H*-Imidazole-Ruthenium Dye Adsorbed on Nanocrystalline TiO<sub>2</sub> Thin Film Electrodes**

Ying Zhang,<sup>†a,b</sup> Stephan Kupfer,<sup>†a</sup> Linda Zedler,<sup>a,b</sup> Julian Schindler,<sup>a,b</sup> Thomas  
Bocklitz,<sup>a</sup> Julien Guthmuller,<sup>c</sup> Sven Rau<sup>d</sup> and Benjamin Dietzek<sup>\*a,b</sup>

[a] Y. Zhang, Dr. S. Kupfer, Dr. L. Zedler, J. Schindler, Dr. T. Bocklitz, Prof. Dr. B. Dietzek  
Institute of Physical Chemistry  
Friedrich Schiller University Jena  
Helmholtzweg 4, 07743 Jena, Germany  
Fax: (+) 49-3641-948302  
E-mail: benjamin.dietzek@uni-jena.de

[b] Y. Zhang, Dr. L. Zedler, J. Schindler, Prof. Dr. B. Dietzek  
Leibniz Institute of Photonic Technology Jena (IPHT)  
Albert-Einstein-Straße 9, 07745 Jena, Germany

[c] Dr. J. Guthmuller  
Faculty of Applied Physics and Mathematics  
Gdansk University of Technology,  
Narutowicza 11/12, 80233 Gdansk, Poland

[d] Prof. Dr. S. Rau  
Institute of Inorganic Chemistry I  
University Ulm  
Albert-Einstein-Allee 11, 89081 Ulm, Germany

<sup>†</sup> Both authors contributed equally to this work.

Table S1: Molecular orbitals involved in the main configurations for the excited states of non-oxidized and oxidized species of **RuIm**.

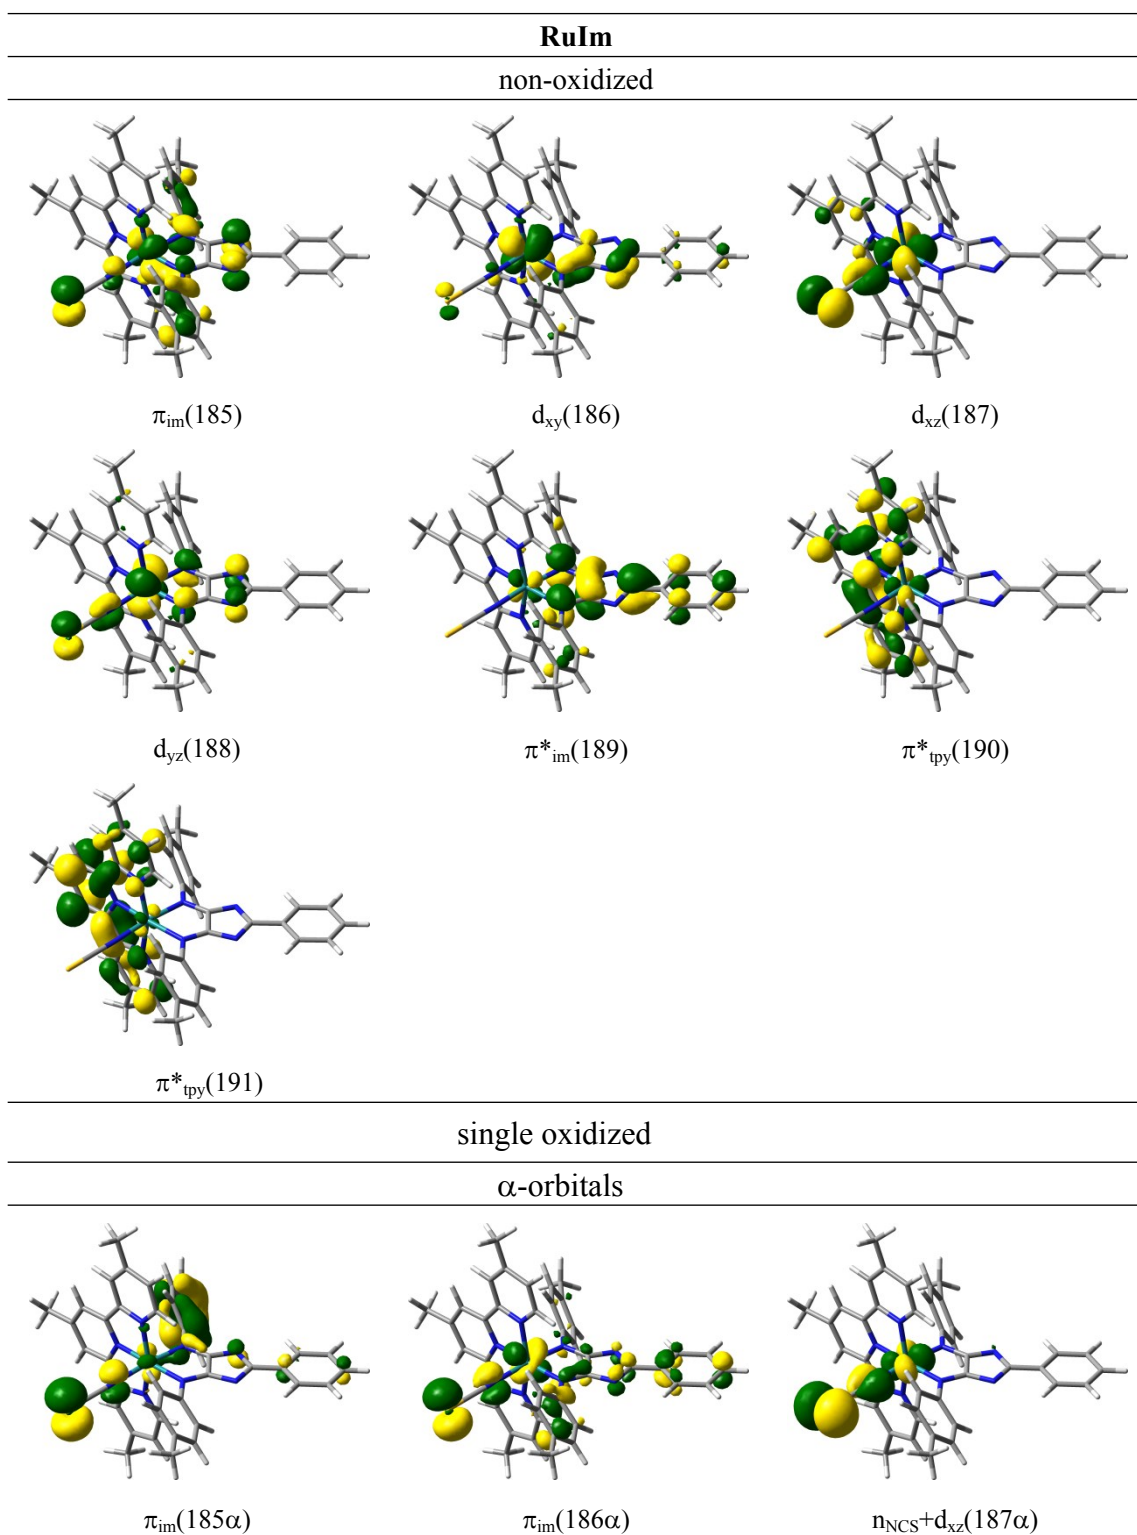

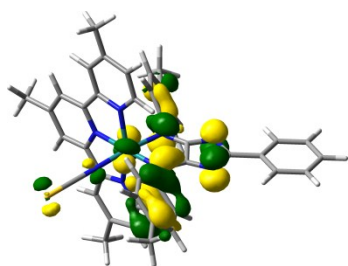

$\pi_{im}(188\alpha)$

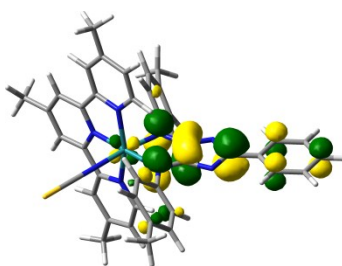

$\pi^*_{im}(189\alpha)$

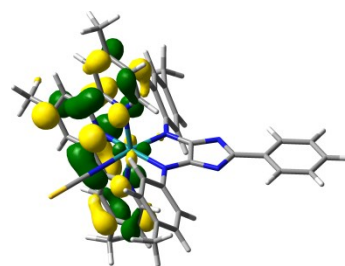

$\pi^*_{tpy}(190\alpha)$

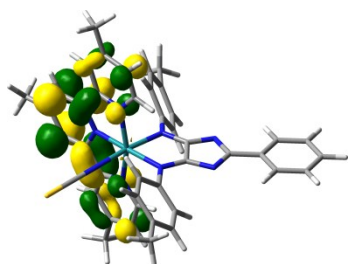

$\pi^*_{tpy}(191\alpha)$

---

$\beta$ -orbitals

---

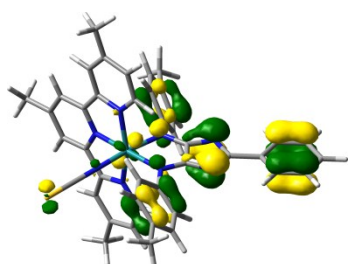

$\pi_{im}(181\beta)$

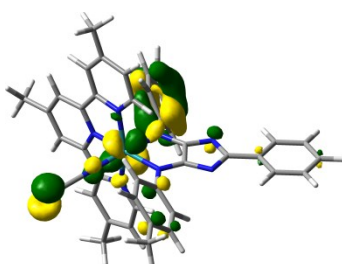

$\pi_{im}(183\beta)$

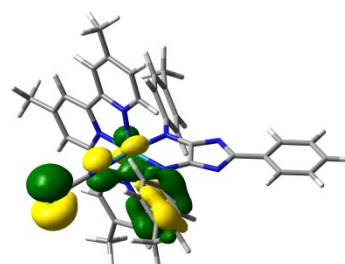

$\pi_{im}(184\beta)$

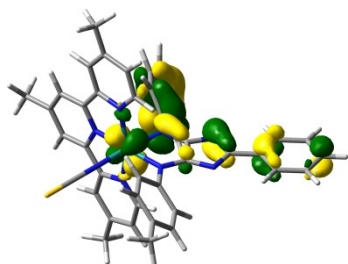

$\pi_{im}(185\beta)$

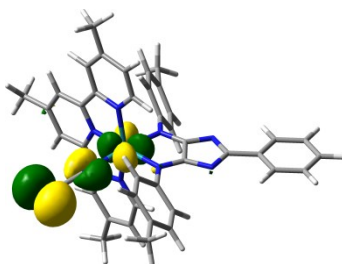

$n_{NCS}+d_{xz}(186\beta)$

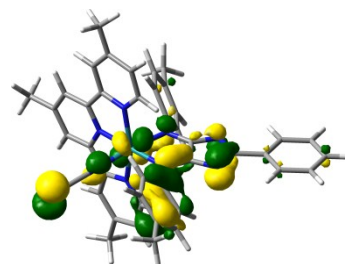

$\pi_{im}(187\beta)$

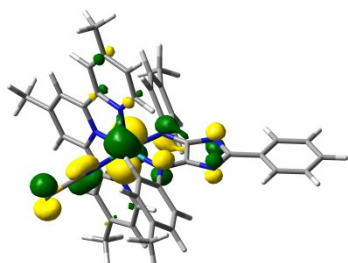

$d_{yz}(188\beta)$

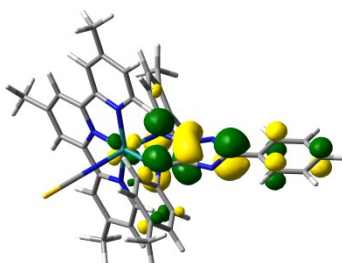

$\pi^*_{im}(189\beta)$

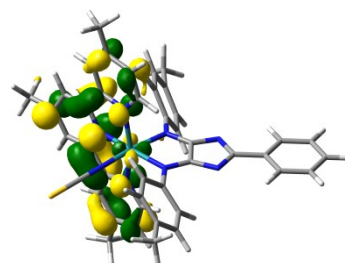

$\pi^*_{tpy}(190\beta)$

---

Table S2. Calculated bright electronic excited states for the non-oxidized and oxidized species of **RuIm** with the main contributing transitions, excitation energies  $E^e$ , oscillator strengths  $f$ , the eigen values of  $\langle s^2 \rangle$ , and experimental absorption maxima.

| <b>RuIm</b>     |                                                                              |               |               |                   |       |                       |                                |
|-----------------|------------------------------------------------------------------------------|---------------|---------------|-------------------|-------|-----------------------|--------------------------------|
| non-oxidized    |                                                                              |               |               |                   |       |                       |                                |
| state           | transition                                                                   | weight /<br>% | $E^e$ /<br>eV | $\lambda$ /<br>nm | $f$   | $\langle s^2 \rangle$ | $\lambda_{\text{exp}}$ /<br>nm |
| S <sub>1</sub>  | $d_{yz}(188) \rightarrow \pi^*_{im}(189)$ (MLCT)                             | 95            | 1.87          | 664               | 0.037 | 0.00                  | 700                            |
| S <sub>2</sub>  | $d_{yz}(188) \rightarrow \pi^*_{tpy}(190)$ (MLCT)                            | 95            | 1.93          | 644               | 0.016 | 0.00                  | 700                            |
| S <sub>6</sub>  | $d_{xz}(187) \rightarrow \pi^*_{tpy}(190)$ (MLCT)                            | 53            | 2.40          | 517               | 0.270 | 0.00                  | 567                            |
|                 | $d_{xy}(186) \rightarrow \pi^*_{im}(189)$ (MLCT)                             | 36            |               |                   |       |                       |                                |
| S <sub>7</sub>  | $d_{xz}(187) \rightarrow \pi^*_{tpy}(191)$ (MLCT)                            | 92            | 2.48          | 500               | 0.040 | 0.00                  | 567                            |
| S <sub>8</sub>  | $d_{xy}(186) \rightarrow \pi^*_{tpy}(191)$ (MLCT)                            | 55            | 2.52          | 491               | 0.072 | 0.00                  | 567                            |
|                 | $d_{xy}(186) \rightarrow \pi^*_{im}(189)$ (MLCT)                             | 28            |               |                   |       |                       |                                |
|                 | $d_{xz}(187) \rightarrow \pi^*_{tpy}(190)$ (MLCT)                            | 9             |               |                   |       |                       |                                |
| S <sub>9</sub>  | $d_{xy}(186) \rightarrow \pi^*_{tpy}(191)$ (MLCT)                            | 37            | 2.65          | 467               | 0.141 | 0.00                  | 427                            |
|                 | $d_{xy}(186) \rightarrow \pi^*_{im}(189)$ (MLCT)                             | 26            |               |                   |       |                       |                                |
|                 | $d_{xz}(187) \rightarrow \pi^*_{tpy}(190)$ (MLCT)                            | 21            |               |                   |       |                       |                                |
| S <sub>10</sub> | $\pi_{im}(185) \rightarrow \pi^*_{im}(189)$ (ILCT)                           | 87            | 2.91          | 426               | 0.221 | 0.00                  | 427                            |
| single oxidized |                                                                              |               |               |                   |       |                       |                                |
| state           | transition                                                                   | weight /<br>% | $E^e$ /<br>eV | $\lambda$ /<br>nm | $f$   | $\langle s^2 \rangle$ | $\lambda_{\text{exp}}$ /<br>nm |
| D <sub>3</sub>  | $\pi_{im}(187\beta) \rightarrow d_{yz}(188\beta)$ (LMCT)                     | 57            | 1.20          | 1030              | 0.053 | 0.81                  | 900                            |
|                 | $\pi_{im}(185\beta) \rightarrow d_{yz}(188\beta)$ (LMCT)                     | 27            |               |                   |       |                       |                                |
| D <sub>4</sub>  | $\pi_{im}(184\beta) \rightarrow d_{yz}(188\beta)$ (LMCT)                     | 35            | 1.68          | 738               | 0.056 | 0.91                  | 900                            |
|                 | $\pi_{im}(185\beta) \rightarrow d_{yz}(188\beta)$ (LMCT)                     | 28            |               |                   |       |                       |                                |
|                 | $\pi_{im}(183\beta) \rightarrow d_{yz}(188\beta)$ (LMCT)                     | 16            |               |                   |       |                       |                                |
| D <sub>6</sub>  | $\pi_{im}(184\beta) \rightarrow d_{yz}(188\beta)$ (LMCT)                     | 41            | 1.84          | 673               | 0.063 | 1.30                  | 900                            |
|                 | $\pi_{im}(183\beta) \rightarrow d_{yz}(188\beta)$ (LMCT)                     | 19            |               |                   |       |                       |                                |
|                 | $\pi_{im}(188\alpha) \rightarrow \pi^*_{im}(189\alpha)$ (ILCT)               | 16            |               |                   |       |                       |                                |
|                 | $\pi_{im}(187\beta) \rightarrow \pi^*_{im}(189\beta)$ (ILCT)                 | 13            |               |                   |       |                       |                                |
| D <sub>16</sub> | $\pi_{im}(187\beta) \rightarrow \pi^*_{im}(189\beta)$ (ILCT)                 | 30            | 2.56          | 484               | 0.195 | 1.18                  | 440                            |
|                 | $\pi_{im}(188\alpha) \rightarrow \pi^*_{im}(189\alpha)$ (ILCT)               | 29            |               |                   |       |                       |                                |
|                 | $\pi_{im}(185\beta) \rightarrow \pi^*_{im}(189\beta)$ (IL)                   | 15            |               |                   |       |                       |                                |
| D <sub>22</sub> | $n_{\text{NCS}}+d_{xz}(187\alpha) \rightarrow \pi^*_{tpy}(190\alpha)$ (LLCT) | 47            | 2.84          | 437               | 0.155 | 1.05                  | 440                            |
|                 | $n_{\text{NCS}}+d_{xz}(186\beta) \rightarrow \pi^*_{tpy}(190\beta)$ (LLCT)   | 16            |               |                   |       |                       |                                |
|                 | $\pi_{im}(186\alpha) \rightarrow \pi^*_{im}(189\alpha)$ (IL)                 | 12            |               |                   |       |                       |                                |
| D <sub>23</sub> | $\pi_{im}(186\alpha) \rightarrow \pi^*_{im}(189\alpha)$ (IL)                 | 28            | 2.90          | 428               | 0.219 | 1.18                  | 440                            |
|                 | $\pi_{im}(188\alpha) \rightarrow \pi^*_{tpy}(191\alpha)$ (ILCT)              | 24            |               |                   |       |                       |                                |
|                 | $\pi_{im}(185\beta) \rightarrow \pi^*_{im}(189\beta)$ (IL)                   | 12            |               |                   |       |                       |                                |
| D <sub>31</sub> | $\pi_{im}(185\alpha) \rightarrow \pi^*_{im}(189\alpha)$ (ILCT)               | 37            | 3.03          | 409               | 0.166 | 1.71                  | 440                            |
|                 | $\pi_{im}(185\beta) \rightarrow \pi^*_{im}(189\beta)$ (IL)                   | 9             |               |                   |       |                       |                                |
|                 | $\pi_{im}(184\beta) \rightarrow \pi^*_{im}(189\beta)$ (ILCT)                 | 9             |               |                   |       |                       |                                |
|                 | $\pi_{im}(181\beta) \rightarrow \pi^*_{im}(189\beta)$ (IL)                   | 8             |               |                   |       |                       |                                |

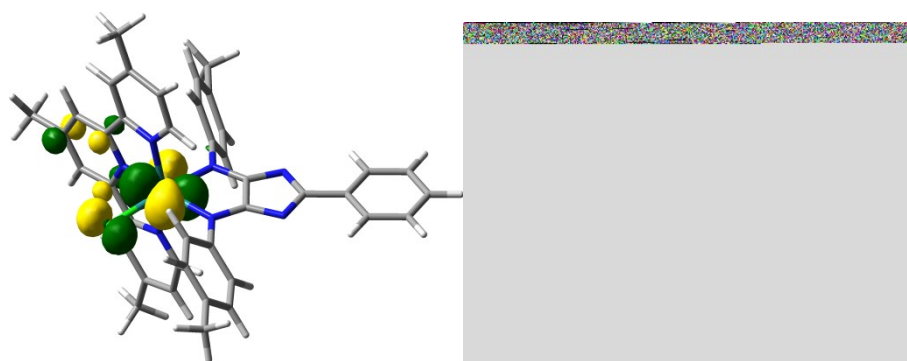

Figure S1. Molecular orbitals  $d_{xy}(180)$  of the chloro-4*H*-imidazole-ruthenium complex (left) as compared with molecular orbitals  $d_{xy}(187)$  of isothiocyanate **RuIm** (right).

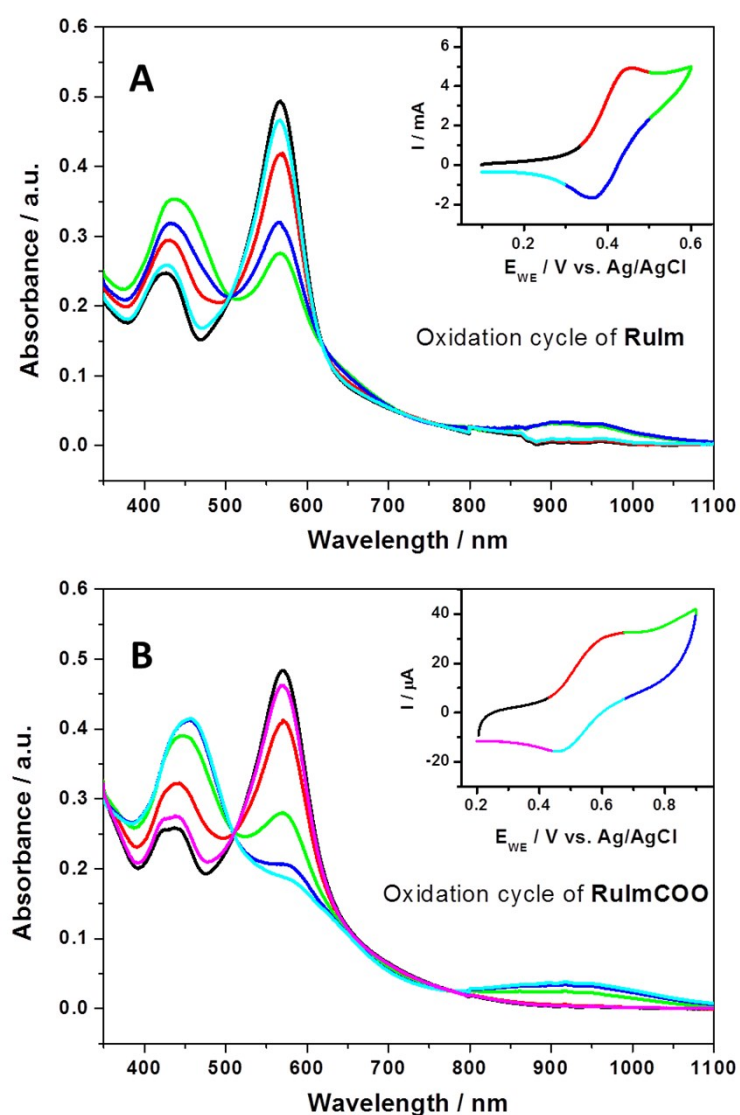

Figure S2. Absorption spectra of **RuIm** (A) and **RuImCOO** (B) in solution during running a CV. The spectra correspond to respective applied potentials of same colors.

Table S3: Total charge density difference between the non-oxidized singlet and the single oxidized doublet ground states within the respective equilibrium geometries of **RuIm**, **RuImCOO** and the respective chloro-complex without anchoring group denoted as **RuCl**.

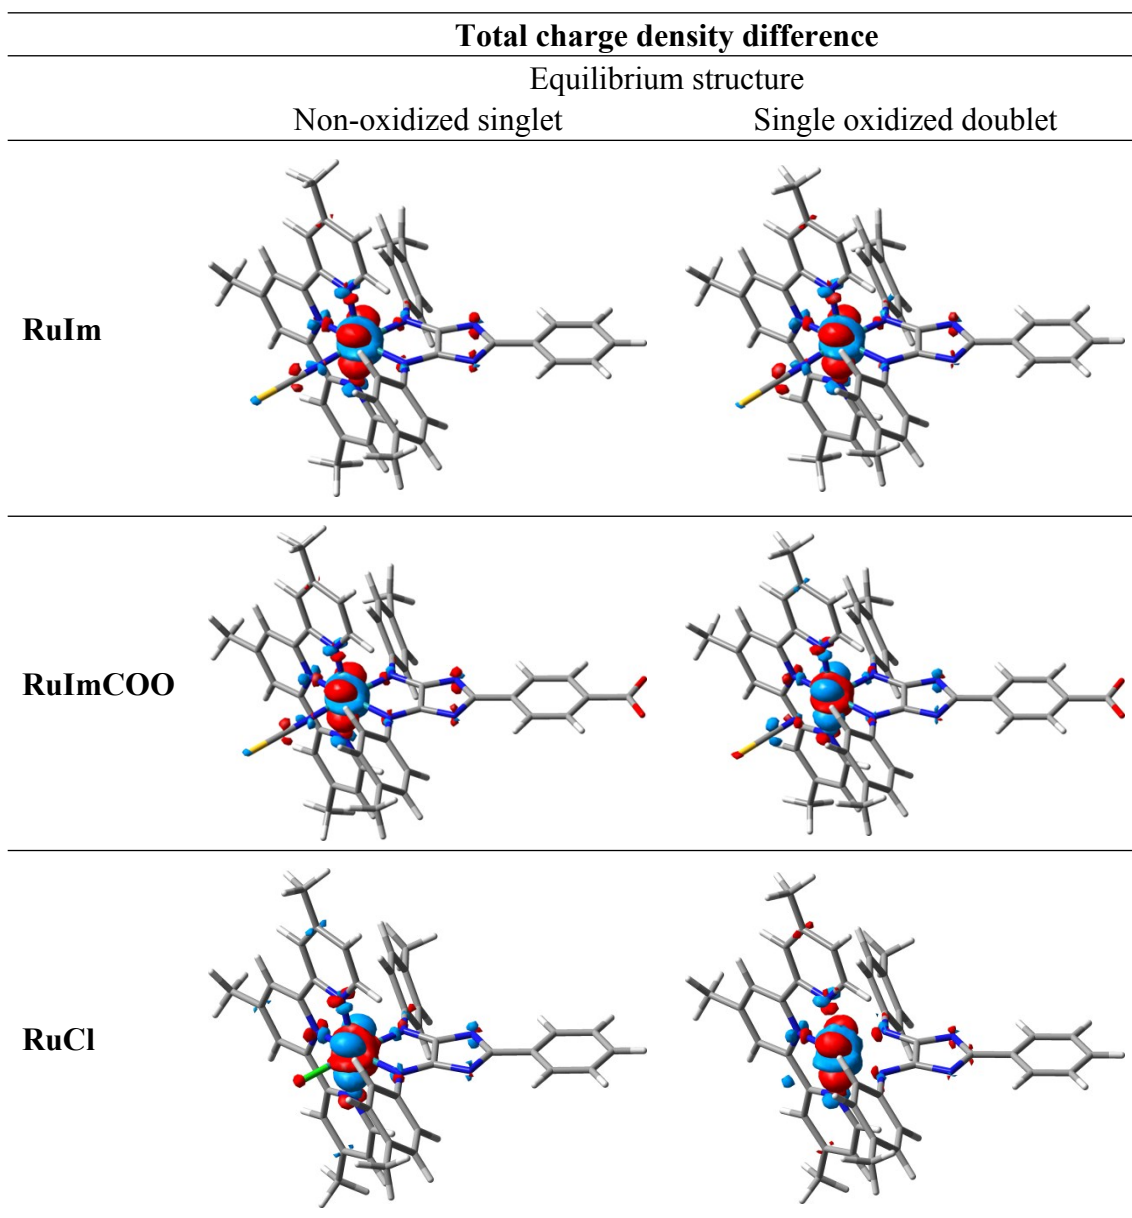

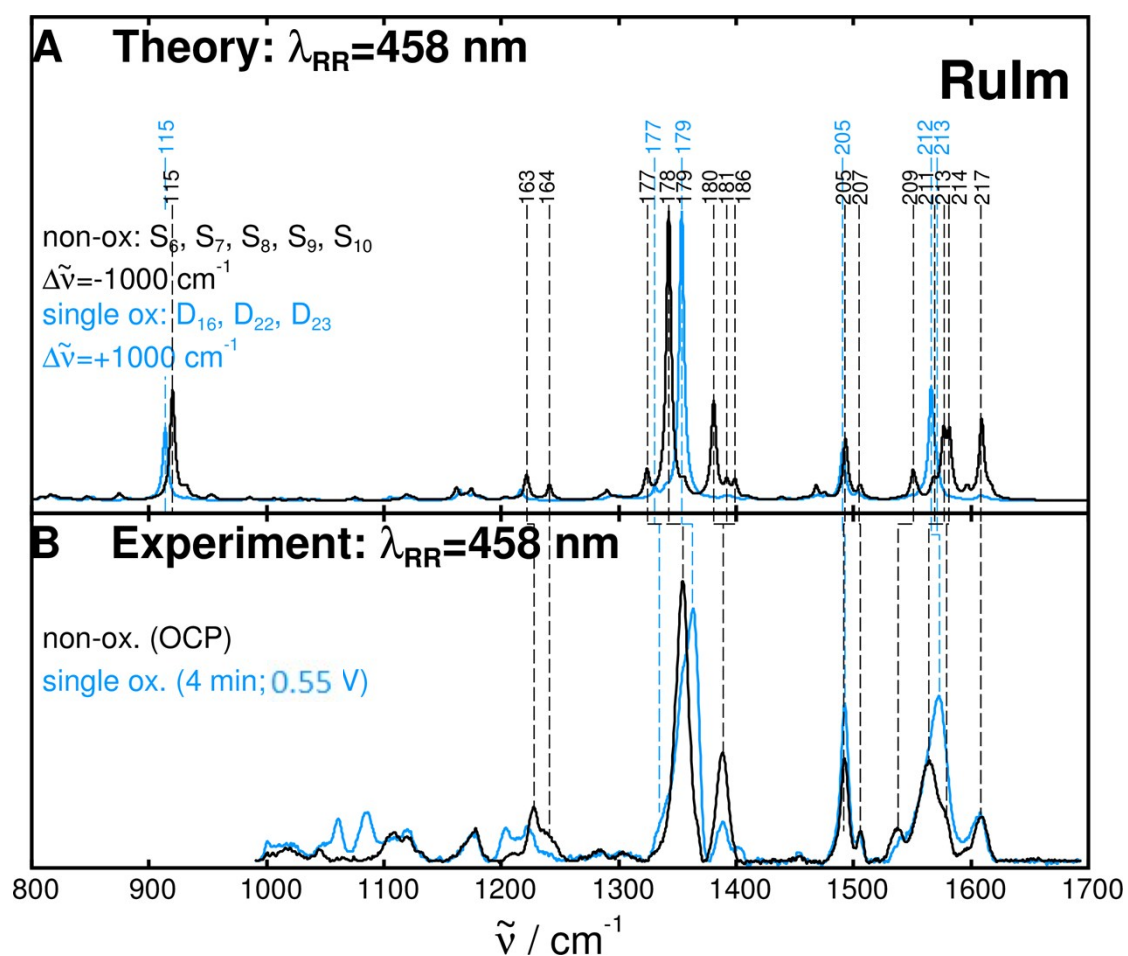

Figure S3. Calculated (A) and experimental (B) RR spectra of non-oxidized (blue) and oxidized (black) species of **RuIm** ( $\lambda_{RR} = 458$  nm), while the vibrational modes are assigned to the measured bands and labeled accordingly.

Table S4. Vibrational modes of the non-oxidized and oxidized species of **RuIm** with relative RR intensities  $\geq 5\%$  ( $\lambda_{RR} = 458$  nm).

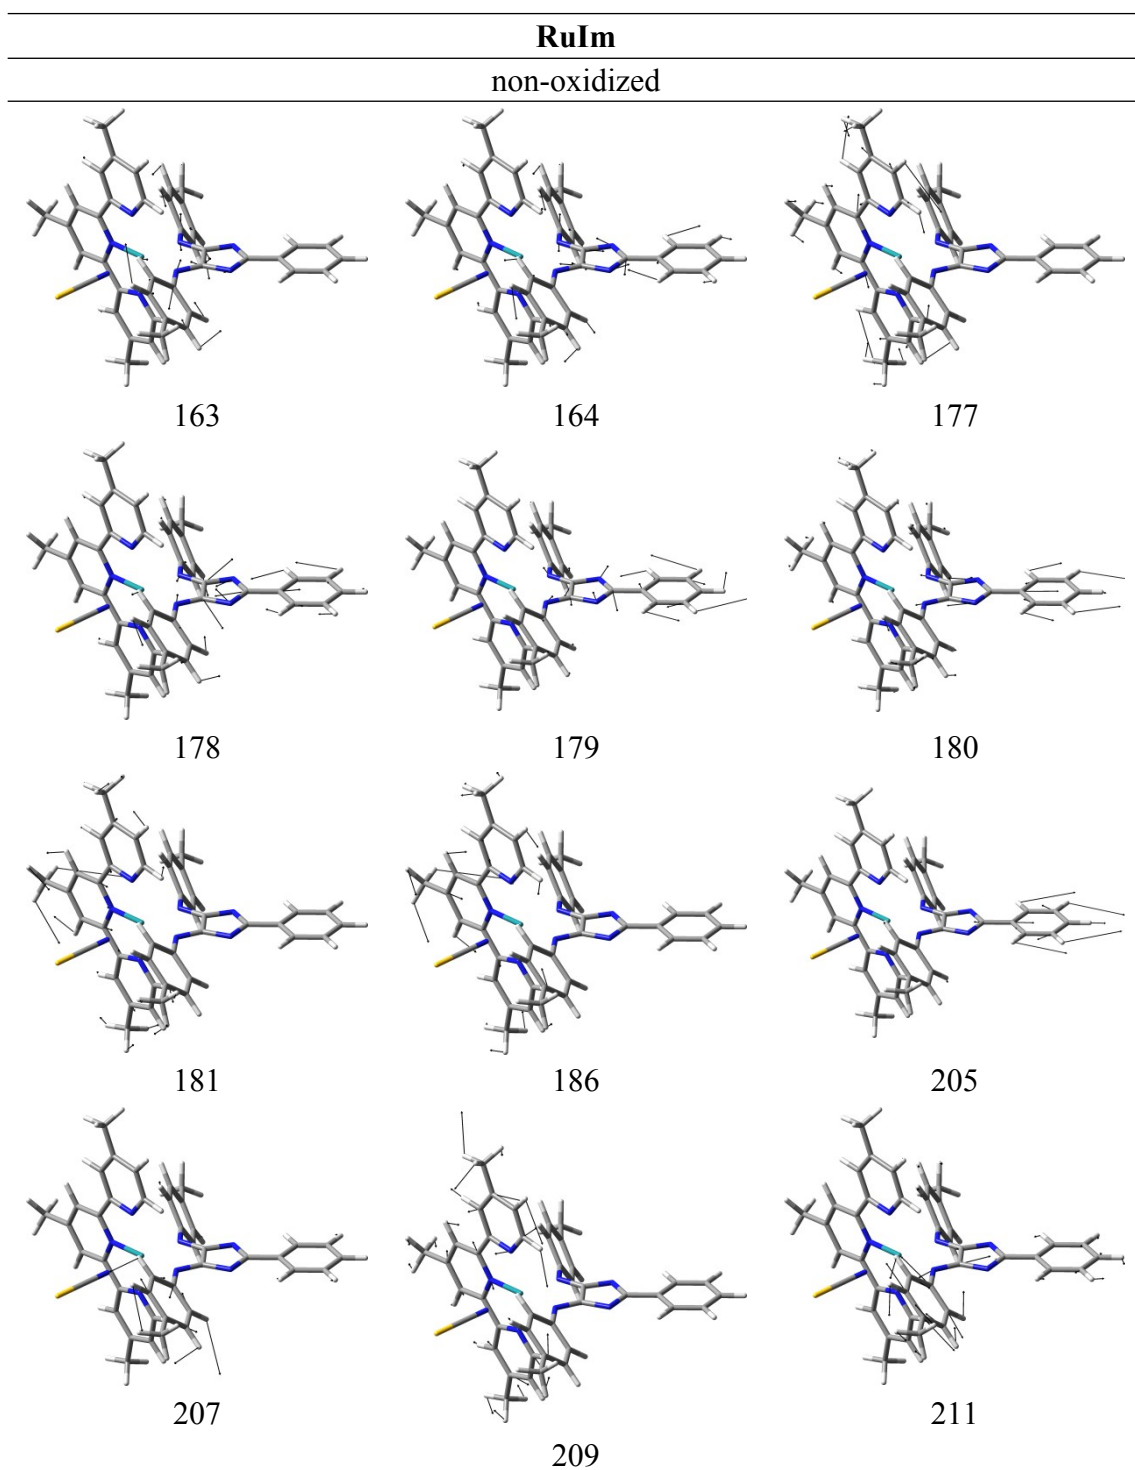



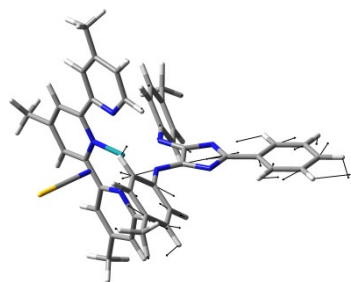

213

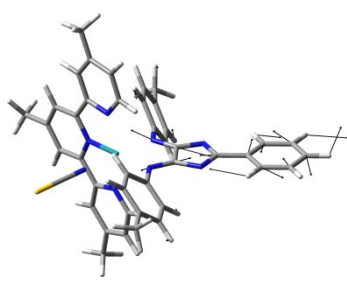

214

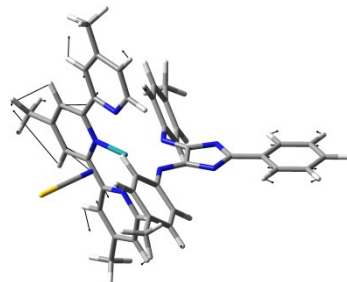

217

---

single oxidized

---

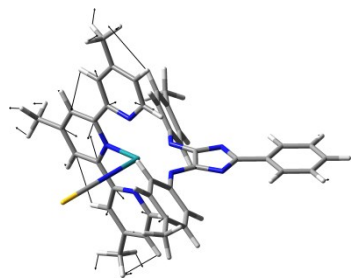

177

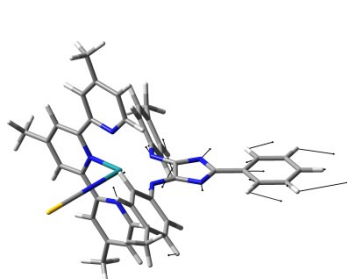

179

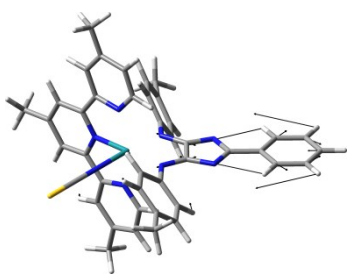

205

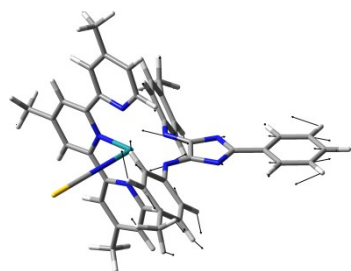

212

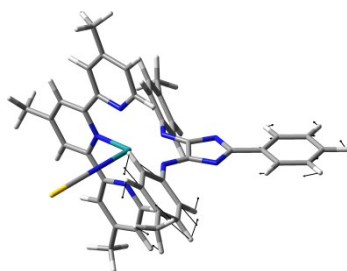

213

---

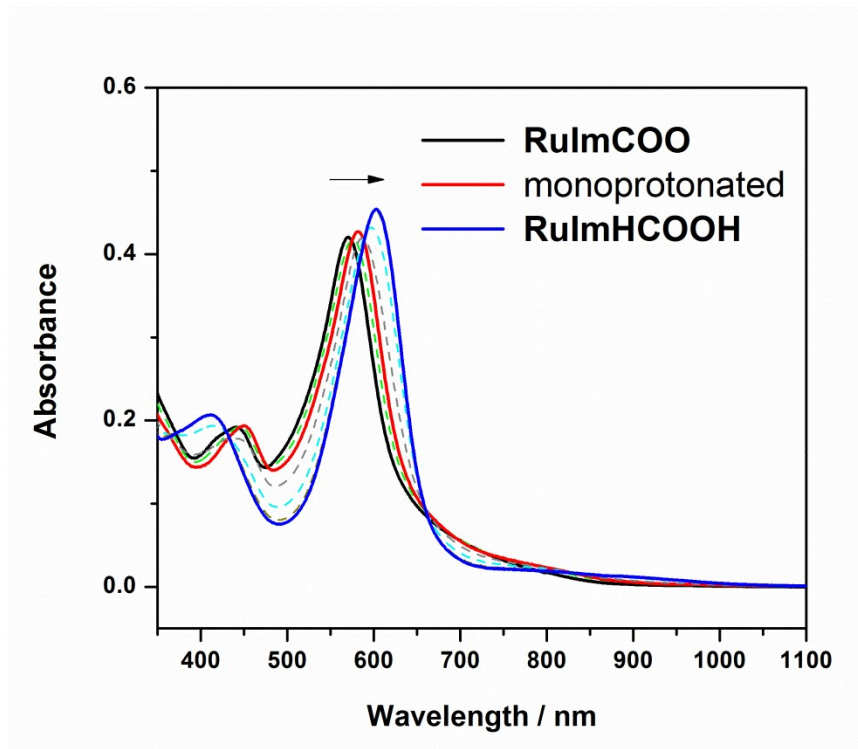

Figure S4. Absorption spectra of the deprotonated **RuImCOO** in ACN on addition of aliquots of TFA acid. The deprotonated form **RuImCOO** is illustrated in black, the single protonated form in red and the double protonated form **RuImHCOOH** in blue.

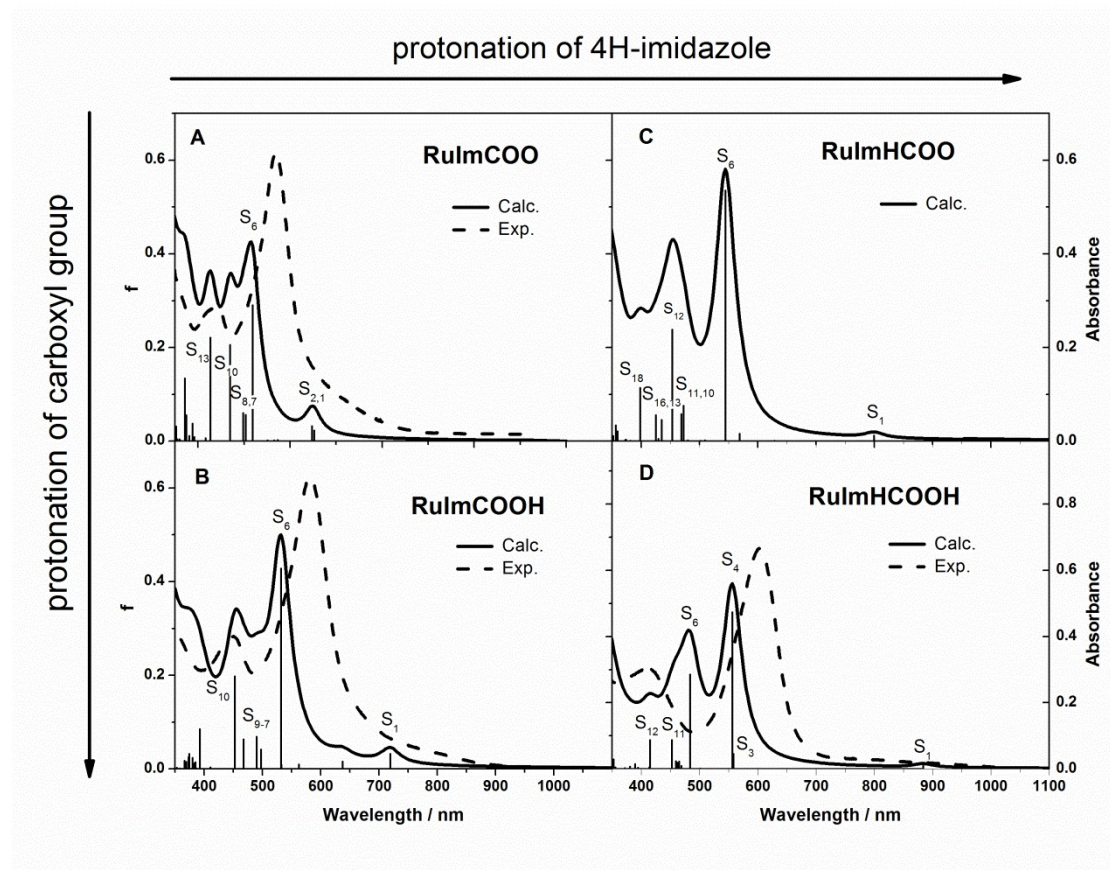

Figure S5. Calculated (solid) and experimental (dashed) absorption spectra for different protonated species of **RuImCOOH** (A-D) in ACN.

Table S5: Molecular orbitals involved in the main configurations for the excited states of non-oxidized and oxidized species of **RuImCOO**.

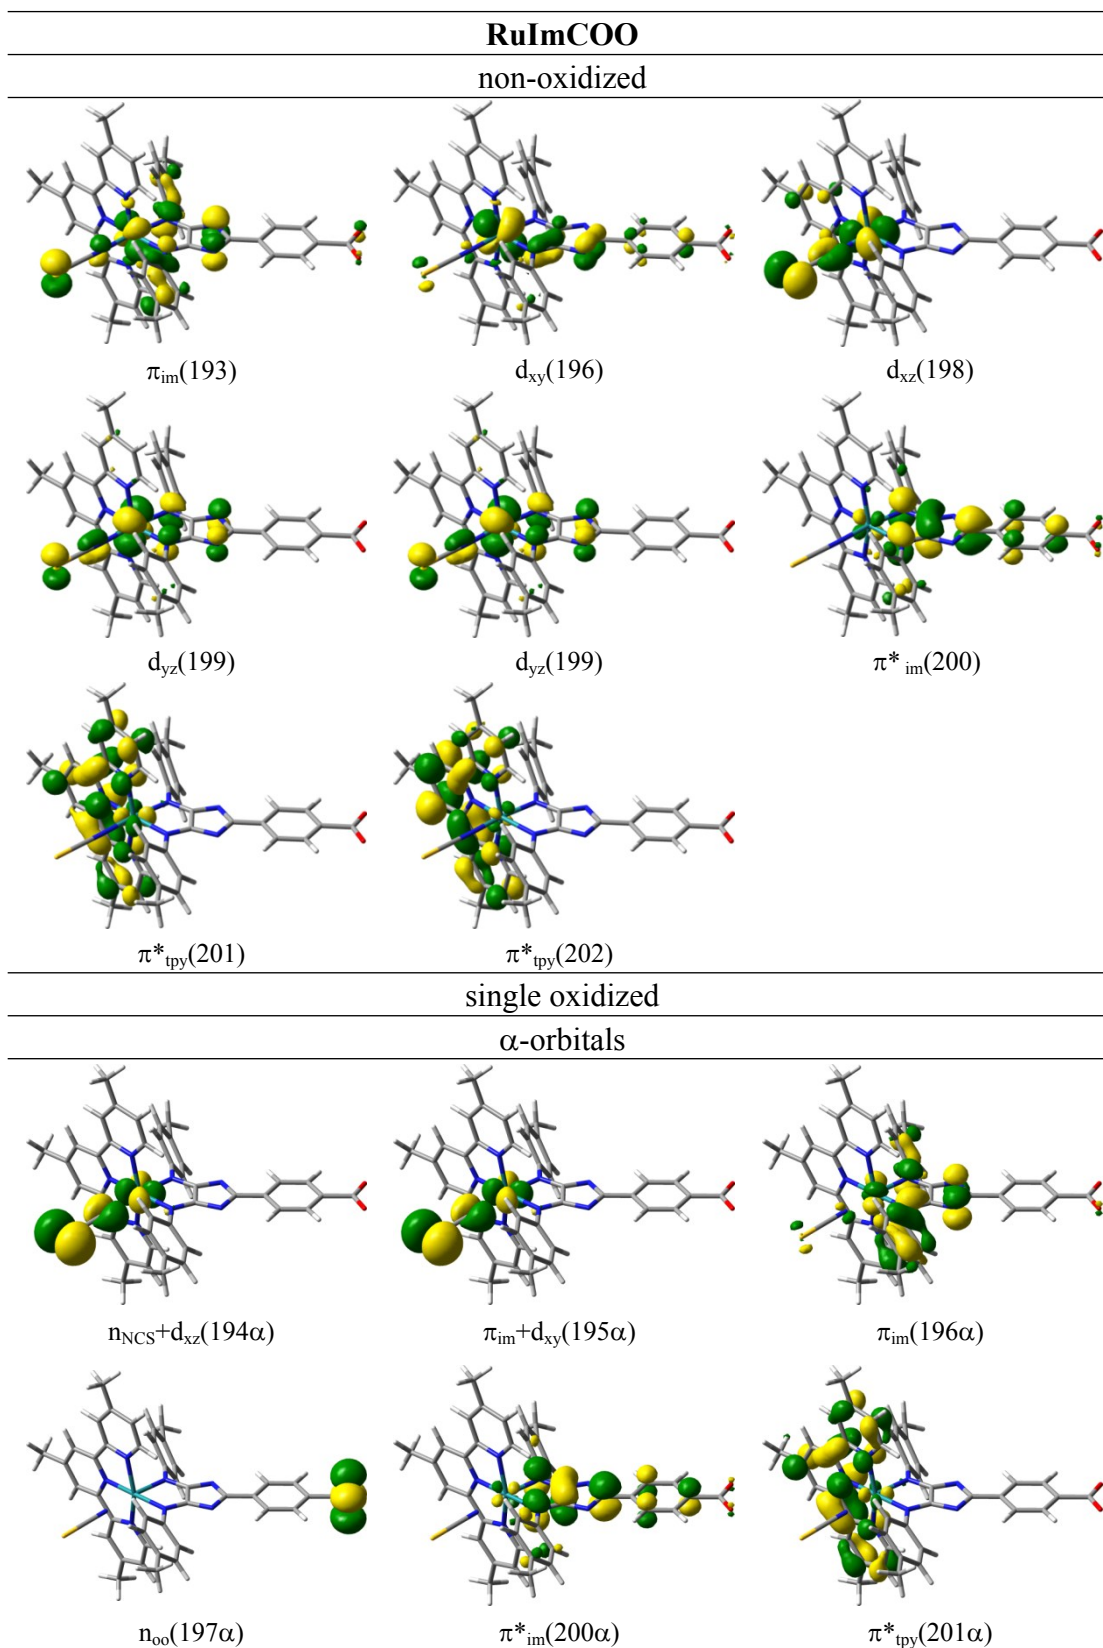

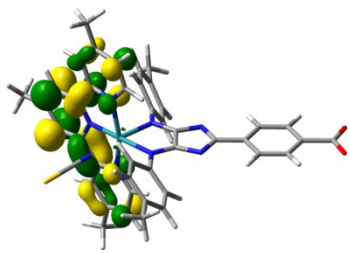

$\pi^*_{\text{tpy}}(202\alpha)$

---

$\beta$ -orbitals

---

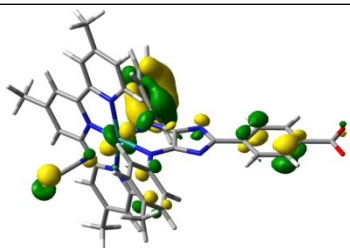

$\pi_{\text{im}}(191\beta)$

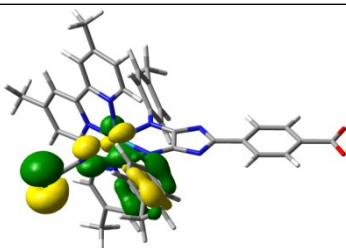

$\pi_{\text{im}}(192\beta)$

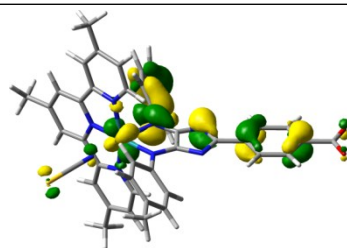

$\pi_{\text{im}}(193\beta)$

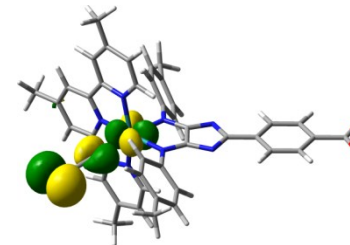

$n_{\text{NCS}}+d_{xz}(194\beta)$

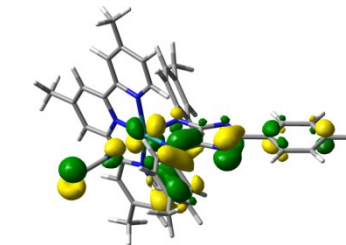

$\pi_{\text{im}}(195\beta)$

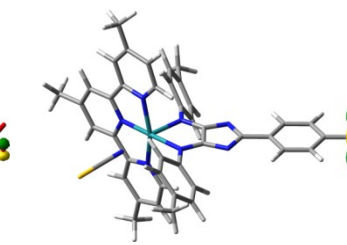

$n_{\text{oo}}(196\beta)$

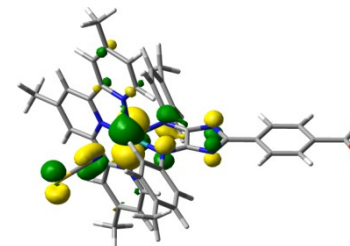

$d_{yz}(199\beta)$

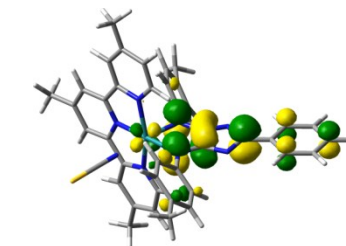

$\pi^*_{\text{im}}(200\beta)$

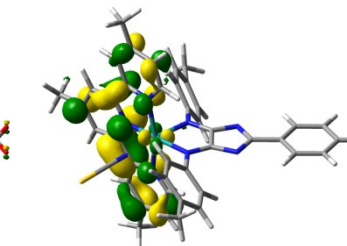

$\pi^*_{\text{tpy}}(201\beta)$

Table S6. Calculated bright electronic excited states for the non-oxidized and oxidized species of **RuImCOO** with the main contributing transitions, excitation energies  $E^e$ , oscillator strengths  $f$ , the eigen values of  $\langle s^2 \rangle$ , and experimental absorption maxima.

| <b>RuImCOO</b>  |                                                                                   |               |               |                   |       |                       |                                |
|-----------------|-----------------------------------------------------------------------------------|---------------|---------------|-------------------|-------|-----------------------|--------------------------------|
| non-oxidized    |                                                                                   |               |               |                   |       |                       |                                |
| state           | transition                                                                        | weight /<br>% | $E^e$ /<br>eV | $\lambda$ /<br>nm | $f$   | $\langle s^2 \rangle$ | $\lambda_{\text{exp}}$ /<br>nm |
| S <sub>1</sub>  | $d_{yz}(199) \rightarrow \pi^*_{\text{tpy}}(201)$ (MLCT)                          | 73            | 1.90          | 652               | 0.023 | 0.00                  | 700                            |
|                 | $d_{yz}(199) \rightarrow \pi^*_{\text{im}}(200)$ (MLCT)                           | 23            |               |                   |       |                       |                                |
| S <sub>2</sub>  | $d_{yz}(199) \rightarrow \pi^*_{\text{im}}(200)$ (MLCT)                           | 74            | 1.91          | 648               | 0.032 | 0.00                  | 700                            |
|                 | $d_{yz}(199) \rightarrow \pi^*_{\text{tpy}}(201)$ (MLCT)                          | 23            |               |                   |       |                       |                                |
| S <sub>6</sub>  | $d_{xz}(198) \rightarrow \pi^*_{\text{tpy}}(201)$ (MLCT)                          | 55            | 2.39          | 518               | 0.291 | 0.00                  | 570                            |
|                 | $d_{xy}(196) \rightarrow \pi^*_{\text{im}}(200)$ (MLCT)                           | 30            |               |                   |       |                       |                                |
| S <sub>7</sub>  | $d_{xz}(198) \rightarrow \pi^*_{\text{tpy}}(202)$ (MLCT)                          | 86            | 2.46          | 503               | 0.056 | 0.00                  | 570                            |
| S <sub>8</sub>  | $d_{xy}(196) \rightarrow \pi^*_{\text{tpy}}(202)$ (MLCT)                          | 63            | 2.49          | 498               | 0.060 | 0.00                  | 570                            |
|                 | $d_{xy}(196) \rightarrow \pi^*_{\text{im}}(200)$ (MLCT)                           | 22            |               |                   |       |                       |                                |
| S <sub>10</sub> | $d_{xy}(196) \rightarrow \pi^*_{\text{im}}(200)$ (MLCT)                           | 32            | 2.64          | 469               | 0.206 | 0.00                  | 420                            |
|                 | $d_{xy}(196) \rightarrow \pi^*_{\text{tpy}}(202)$ (MLCT)                          | 27            |               |                   |       |                       |                                |
|                 | $d_{xz}(198) \rightarrow \pi^*_{\text{tpy}}(201)$ (MLCT)                          | 22            |               |                   |       |                       |                                |
| S <sub>13</sub> | $\pi_{\text{im}}(193) \rightarrow \pi^*_{\text{im}}(200)$ (ILCT)                  | 87            | 2.91          | 426               | 0.221 | 0.00                  | 439                            |
| single oxidized |                                                                                   |               |               |                   |       |                       |                                |
| state           | transition                                                                        | weight /<br>% | $E^e$ /<br>eV | $\lambda$ /<br>nm | $f$   | $\langle s^2 \rangle$ | $\lambda_{\text{exp}}$ /<br>nm |
| D <sub>4</sub>  | $\pi_{\text{im}}(193\beta) \rightarrow d_{yz}(199\beta)$ (LMCT)                   | 42            | 1.20          | 1037              | 0.058 | 0.81                  | 900                            |
|                 | $\pi_{\text{im}}(195\beta) \rightarrow d_{yz}(199\beta)$ (LMCT)                   | 41            |               |                   |       |                       |                                |
|                 | $\pi_{\text{im}}(192\beta) \rightarrow d_{yz}(199\beta)$ (LMCT)                   | 8             |               |                   |       |                       |                                |
| D <sub>7</sub>  | $\pi_{\text{im}}(192\beta) \rightarrow d_{yz}(199\beta)$ (LMCT)                   | 34            | 1.64          | 754               | 0.063 | 0.89                  | 900                            |
|                 | $\pi_{\text{im}}(193\beta) \rightarrow d_{yz}(199\beta)$ (LMCT)                   | 33            |               |                   |       |                       |                                |
|                 | $\pi_{\text{im}}(191\beta) \rightarrow d_{yz}(199\beta)$ (LMCT)                   | 12            |               |                   |       |                       |                                |
| D <sub>9</sub>  | $\pi_{\text{im}}(192\beta) \rightarrow d_{yz}(199\beta)$ (LMCT)                   | 38            | 1.86          | 665               | 0.056 | 1.37                  | 900                            |
|                 | $\pi_{\text{im}}(196\alpha) \rightarrow \pi^*_{\text{im}}(200\alpha)$ (ILCT)      | 18            |               |                   |       |                       |                                |
|                 | $\pi_{\text{im}}(195\beta) \rightarrow \pi^*_{\text{im}}(200\beta)$ (ILCT)        | 13            |               |                   |       |                       |                                |
|                 | $\pi_{\text{im}}(191\beta) \rightarrow d_{yz}(199\beta)$ (LMCT)                   | 13            |               |                   |       |                       |                                |
| D <sub>25</sub> | $n_{\text{oo}}(196\beta) \rightarrow \pi^*_{\text{im}}(200\beta)$ (ILCT)          | 36            | 2.55          | 485               | 0.137 | 1.01                  | 459                            |
|                 | $\pi_{\text{im}}(195\beta) \rightarrow \pi^*_{\text{im}}(200\beta)$ (ILCT)        | 17            |               |                   |       |                       |                                |
|                 | $n_{\text{oo}}(197\alpha) \rightarrow \pi^*_{\text{im}}(200\alpha)$ (ILCT)        | 15            |               |                   |       |                       |                                |
|                 | $\pi_{\text{im}}(196\alpha) \rightarrow \pi^*_{\text{im}}(200\alpha)$ (ILCT)      | 13            |               |                   |       |                       |                                |
|                 | $\pi_{\text{im}}(193\beta) \rightarrow \pi^*_{\text{im}}(200\beta)$ (ILCT)        | 12            |               |                   |       |                       |                                |
| D <sub>27</sub> | $n_{\text{oo}}(196\beta) \rightarrow \pi^*_{\text{im}}(200\beta)$ (ILCT)          | 18            | 2.58          | 481               | 0.085 | 1.48                  | 459                            |
|                 | $n_{\text{NCS}}+d_{xz}(194\beta) \rightarrow \pi^*_{\text{im}}(200\beta)$ (ILCT)  | 18            |               |                   |       |                       |                                |
|                 | $\pi_{\text{im}}(196\alpha) \rightarrow \pi^*_{\text{im}}(200\alpha)$ (ILCT)      | 13            |               |                   |       |                       |                                |
|                 | $\pi_{\text{im}}(195\beta) \rightarrow \pi^*_{\text{im}}(200\beta)$ (ILCT)        | 12            |               |                   |       |                       |                                |
|                 | $n_{\text{NCS}}+d_{xz}(194\beta) \rightarrow \pi^*_{\text{tpy}}(201\beta)$ (LLCT) | 12            |               |                   |       |                       |                                |

|                 |                                                                                             |    |      |     |       |      |     |
|-----------------|---------------------------------------------------------------------------------------------|----|------|-----|-------|------|-----|
| D <sub>37</sub> | $n_{\text{NCS}}+d_{\text{xz}}(194\alpha) \rightarrow \pi_{\text{tpy}}^*(201\alpha)$ (LLCT)  | 29 | 2.81 | 441 | 0.327 | 1.07 | 459 |
|                 | $\pi_{\text{im}}+d_{\text{xy}}(195\alpha) \rightarrow \pi_{\text{im}}^*(200\alpha)$ (ILCT)  | 18 |      |     |       |      |     |
|                 | $\pi_{\text{im}}(193\beta) \rightarrow \pi_{\text{im}}^*(200\beta)$ (ILCT)                  | 13 |      |     |       |      |     |
|                 | $n_{\text{NCS}}+d_{\text{xz}}(194\beta) \rightarrow \pi_{\text{tpy}}^*(201\beta)$ (LLCT)    | 12 |      |     |       |      |     |
|                 | $\pi_{\text{im}}+d_{\text{xy}}(195\alpha) \rightarrow \pi_{\text{tpy}}^*(201\alpha)$ (LLCT) | 11 |      |     |       |      |     |
| D <sub>38</sub> | $\pi_{\text{im}}+d_{\text{xy}}(195\alpha) \rightarrow \pi_{\text{tpy}}^*(201\alpha)$ (LLCT) | 57 | 2.85 | 435 | 0.176 | 1.46 | 459 |
|                 | $\pi_{\text{im}}+d_{\text{xy}}(195\alpha) \rightarrow \pi_{\text{im}}^*(200\alpha)$ (ILCT)  | 13 |      |     |       |      |     |
| D <sub>39</sub> | $\pi_{\text{im}}(196\alpha) \rightarrow \pi_{\text{tpy}}^*(202\alpha)$ (ILCT)               | 45 | 2.87 | 432 | 0.098 | 1.18 | 459 |

---

Table S7. Calculated bright electronic excited states for the monoprotinated species **RuImCOOH** and **RuImHCOO** with the main contributing transitions, excitation energies  $E^e$ , oscillator strengths  $f$ , the eigen values of  $\langle s^2 \rangle$ , and experimental absorption maxima.

| <b>RuImCOOH</b> |                                                                                 |              |            |                |       |                       |                             |
|-----------------|---------------------------------------------------------------------------------|--------------|------------|----------------|-------|-----------------------|-----------------------------|
| state           | transition                                                                      | non-oxidized |            |                |       |                       |                             |
|                 |                                                                                 | weight / %   | $E^e$ / eV | $\lambda$ / nm | $f$   | $\langle s^2 \rangle$ | $\lambda_{\text{exp}}$ / nm |
| S <sub>1</sub>  | $d_{yz}(199) \rightarrow \pi^*_{\text{im}}(200)$ (MLCT)                         | 96           | 1.72       | 719            | 0.032 | 0.00                  | 700                         |
| S <sub>6</sub>  | $d_{xy}(197) \rightarrow \pi^*_{\text{im}}(200)$ (MLCT)                         | 64           | 2.33       | 532            | 0.428 | 0.00                  | 582                         |
|                 | $d_{xz}(198) \rightarrow \pi^*_{\text{tpy}}(201)$ (MLCT)                        | 28           |            |                |       |                       |                             |
| S <sub>7</sub>  | $d_{xz}(198) \rightarrow \pi^*_{\text{tpy}}(202)$ (MLCT)                        | 80           | 2.49       | 497            | 0.041 | 0.00                  | 582                         |
|                 | $d_{xz}(198) \rightarrow \pi^*_{\text{tpy}}(201)$ (MLCT)                        | 9            |            |                |       |                       |                             |
| S <sub>8</sub>  | $d_{xz}(198) \rightarrow \pi^*_{\text{tpy}}(201)$ (MLCT)                        | 31           | 2.53       | 490            | 0.069 | 0.00                  | 582                         |
|                 | $d_{xy}(197) \rightarrow \pi^*_{\text{tpy}}(202)$ (MLCT)                        | 27           |            |                |       |                       |                             |
|                 | $d_{xy}(197) \rightarrow \pi^*_{\text{im}}(200)$ (MLCT)                         | 17           |            |                |       |                       |                             |
|                 | $d_{xz}(198) \rightarrow \pi^*_{\text{tpy}}(202)$ (MLCT)                        | 16           |            |                |       |                       |                             |
| S <sub>9</sub>  | $d_{xy}(197) \rightarrow \pi^*_{\text{tpy}}(202)$ (MLCT)                        | 65           | 2.65       | 468            | 0.063 | 0.00                  | 425                         |
|                 | $d_{xz}(198) \rightarrow \pi^*_{\text{tpy}}(201)$ (MLCT)                        | 14           |            |                |       |                       |                             |
| S <sub>10</sub> | $d_{yz}+\pi_{\text{im}}(196) \rightarrow \pi^*_{\text{im}}(200)$<br>(MLCT/ILCT) | 90           | 2.74       | 452            | 0.198 | 0.00                  | 451                         |

  

| <b>RuImHCOO</b> |                                                                        |              |            |                |       |                       |                             |
|-----------------|------------------------------------------------------------------------|--------------|------------|----------------|-------|-----------------------|-----------------------------|
| state           | transition                                                             | non-oxidized |            |                |       |                       |                             |
|                 |                                                                        | weight / %   | $E^e$ / eV | $\lambda$ / nm | $f$   | $\langle s^2 \rangle$ | $\lambda_{\text{exp}}$ / nm |
| S <sub>1</sub>  | $d_{yz}(199) \rightarrow \pi^*_{\text{im}}(200)$ (MLCT)                | 94           | 1.55       | 799            | 0.012 | 0.00                  | -                           |
| S <sub>6</sub>  | $d_{xy}(195) \rightarrow \pi^*_{\text{im}}(200)$ (MLCT)                | 81           | 2.28       | 544            | 0.536 | 0.00                  | -                           |
|                 | $d_{xz}(197) \rightarrow \pi^*_{\text{tpy}}(201)$ (MLCT)               | 10           |            |                |       |                       |                             |
| S <sub>10</sub> | $d_{xz}(197) \rightarrow \pi^*_{\text{tpy}}(202)$ (MLCT)               | 35           | 2.62       | 473            | 0.076 | 0.00                  | -                           |
|                 | $d_{xz}(197) \rightarrow \pi^*_{\text{tpy}}(201)$ (MLCT)               | 30           |            |                |       |                       |                             |
|                 | $d_{yz}(199) \rightarrow \pi^*_{\text{tpy}}(202)$ (MLCT)               | 19           |            |                |       |                       |                             |
| S <sub>11</sub> | $d_{xz}(197) \rightarrow \pi^*_{\text{tpy}}(202)$ (MLCT)               | 62           | 2.64       | 469            | 0.058 | 0.00                  | -                           |
|                 | $d_{xz}(197) \rightarrow \pi^*_{\text{tpy}}(201)$ (MLCT)               | 17           |            |                |       |                       |                             |
|                 | $d_{yz}(199) \rightarrow \pi^*_{\text{tpy}}(202)$ (MLCT)               | 11           |            |                |       |                       |                             |
| S <sub>12</sub> | $\pi_{\text{im}}(193) \rightarrow \pi^*_{\text{im}}(200)$ (ILCT)       | 86           | 2.74       | 453            | 0.268 | 0.00                  | -                           |
| S <sub>13</sub> | $n_{\text{NCS}}+d_{yz}(192) \rightarrow \pi^*_{\text{im}}(200)$ (LLCT) | 81           | 2.85       | 435            | 0.045 | 0.00                  | -                           |
| S <sub>16</sub> | $n_{\text{NCS}}+d_{xz}(191) \rightarrow \pi^*_{\text{im}}(200)$ (LLCT) | 77           | 2.92       | 425            | 0.055 | 0.00                  | -                           |
|                 | $d_{xy}(195) \rightarrow \pi^*_{\text{tpy}}(202)$ (MLCT)               | 11           |            |                |       |                       |                             |
| S <sub>18</sub> | $\pi_{\text{im}}(190) \rightarrow \pi^*_{\text{im}}(200)$ (ILCT)       | 98           | 3.12       | 398            | 0.114 | 0.00                  | -                           |



Table S8. Calculated bright electronic excited states for the double-protonated species **RuImHCOOH** with the main contributing transitions, excitation energies  $E^e$ , oscillator strengths  $f$ , the eigen values of  $\langle s^2 \rangle$ , and experimental absorption maxima.

| RuImHCOOH       |                                                                 |              |            |                |       |                       |                             |
|-----------------|-----------------------------------------------------------------|--------------|------------|----------------|-------|-----------------------|-----------------------------|
| state           | transition                                                      | non-oxidized |            |                |       |                       |                             |
|                 |                                                                 | weight / %   | $E^e$ / eV | $\lambda$ / nm | $f$   | $\langle s^2 \rangle$ | $\lambda_{\text{exp}}$ / nm |
| S <sub>1</sub>  | $d_{yz}(199) \rightarrow \pi^*_{im}(200)$ (MLCT)                | 93           | 1.40       | 884            | 0.011 | 0.00                  | -                           |
| S <sub>3</sub>  | $d_{yz}(199) \rightarrow \pi^*_{ipy}(201)$ (MLCT)               | 92           | 2.22       | 558            | 0.045 | 0.00                  | 603                         |
| S <sub>4</sub>  | $d_{xy}(197) \rightarrow \pi^*_{im}(200)$ (MLCT)                | 79           | 2.23       | 556            | 0.473 | 0.00                  | 603                         |
| S <sub>6</sub>  | $\pi_{im}(196) \rightarrow \pi^*_{im}(200)$ (ILCT)              | 80           | 2.56       | 484            | 0.285 | 0.00                  | 412                         |
| S <sub>11</sub> | $n_{\text{NCS}}+d_{xz}(194) \rightarrow \pi^*_{im}(200)$ (LLCT) | 77           | 2.74       | 452            | 0.087 | 0.00                  | -                           |
|                 | $n_{\text{NCS}}+d_{yz}(195) \rightarrow \pi^*_{im}(200)$ (LLCT) | 10           |            |                |       |                       |                             |
| S <sub>12</sub> | $\pi_{im}(193) \rightarrow \pi^*_{im}(200)$ (ILCT)              | 89           | 2.99       | 415            | 0.087 | 0.00                  | -                           |

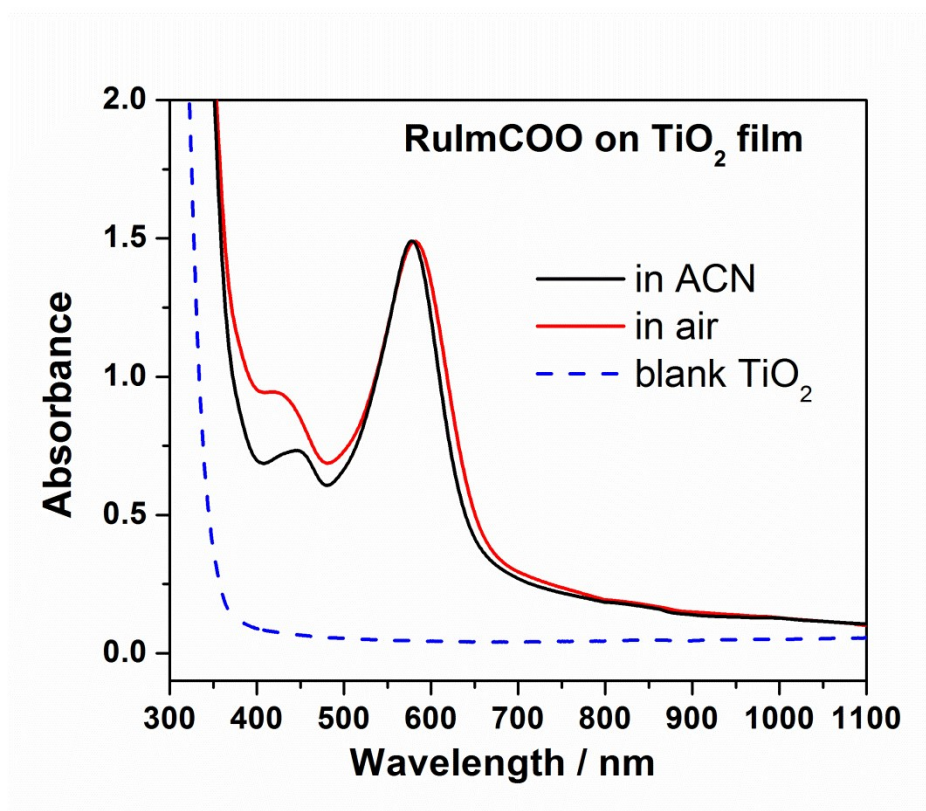

Figure S6. Absorption spectra of **RuImCOO** on TiO<sub>2</sub> film in ACN (black) and under air conditions (red) as well as a blank TiO<sub>2</sub> film (dash blue). The TiO<sub>2</sub> film shows negligible absorbance in the visible region, makes it feasible for SEC measurements of absorbed molecules.

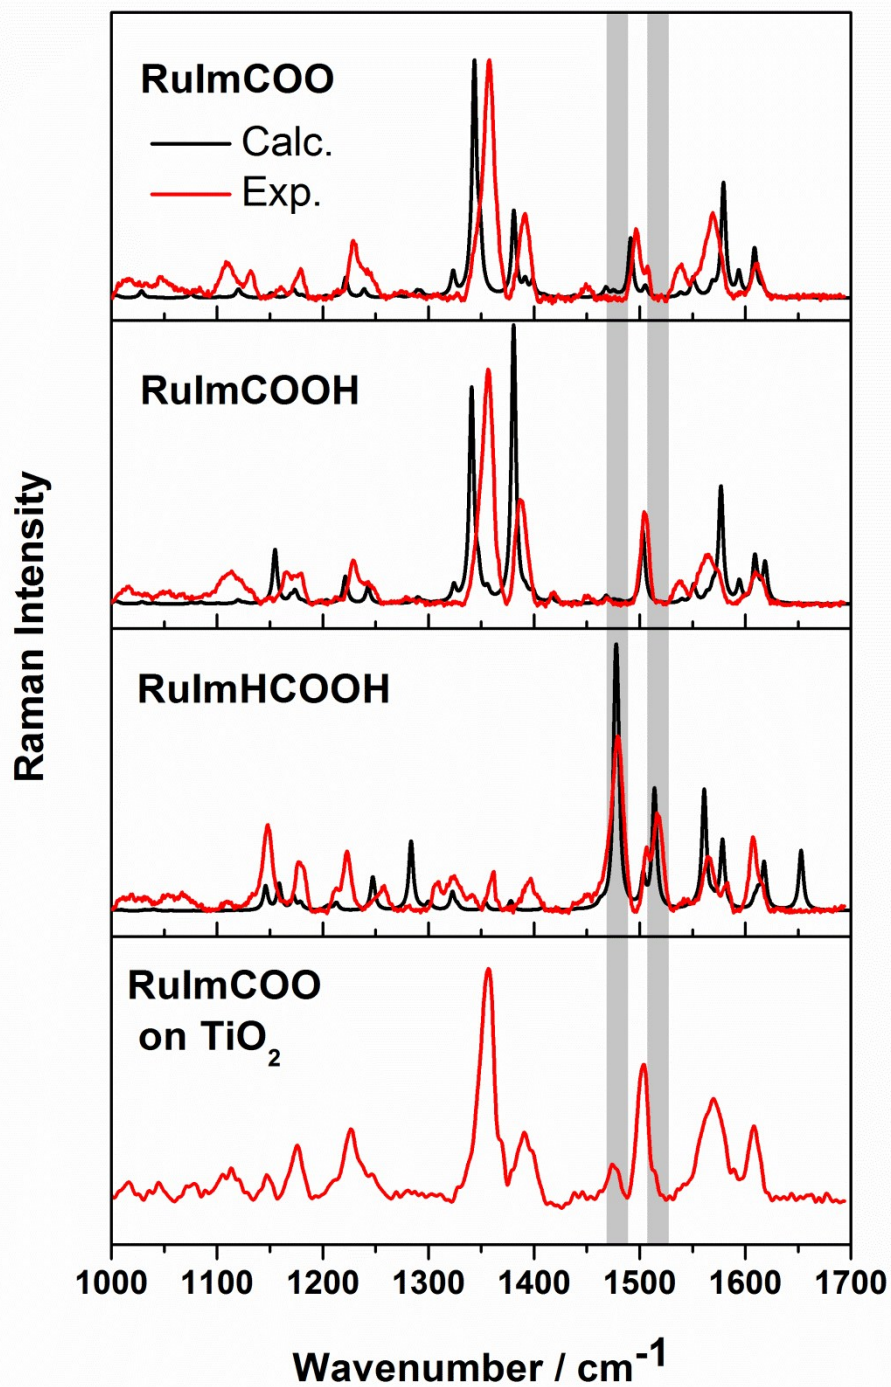

Figure S7. Calculated (black) and experimental (red) RR spectra of different protonation forms of **RuImCOOH** in ACN, as well as the RR spectra of **RuImCOO** on TiO<sub>2</sub>, measured at 458 nm. Highlighted in grey are the locations of the signature bands of the protonated imidazole ring.

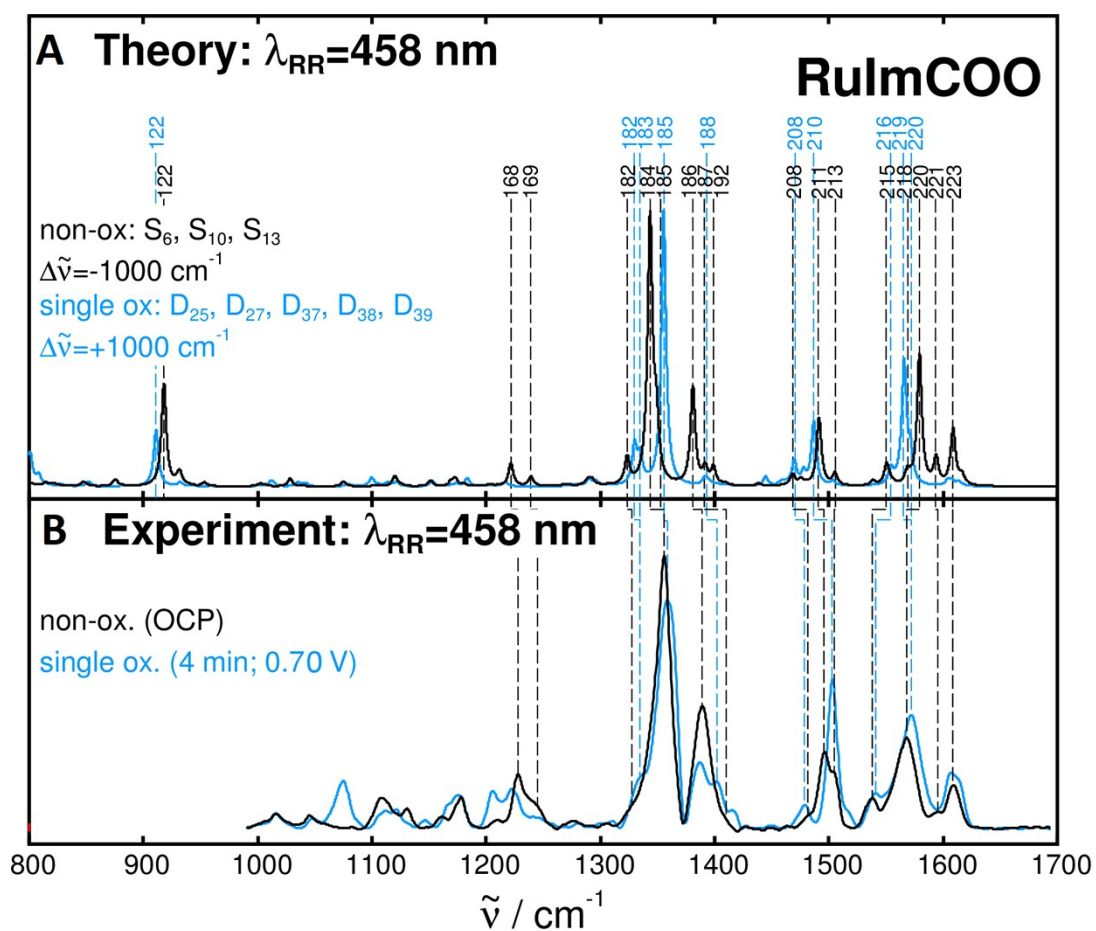

Figure S8. Calculated (A) and experimental (B) RR spectra of non-oxidized (blue) and oxidized (black) species of **RuImCOO** in solution ( $\lambda_{RR} = 458$  nm), while the vibrational modes are assigned to the measured bands and labeled accordingly.

Table S9. Vibrational modes of the non-oxidized and oxidized species of **RuImCOO** with relative RR intensities  $\geq 5\%$  ( $\lambda_{\text{RR}} = 458 \text{ nm}$ ).

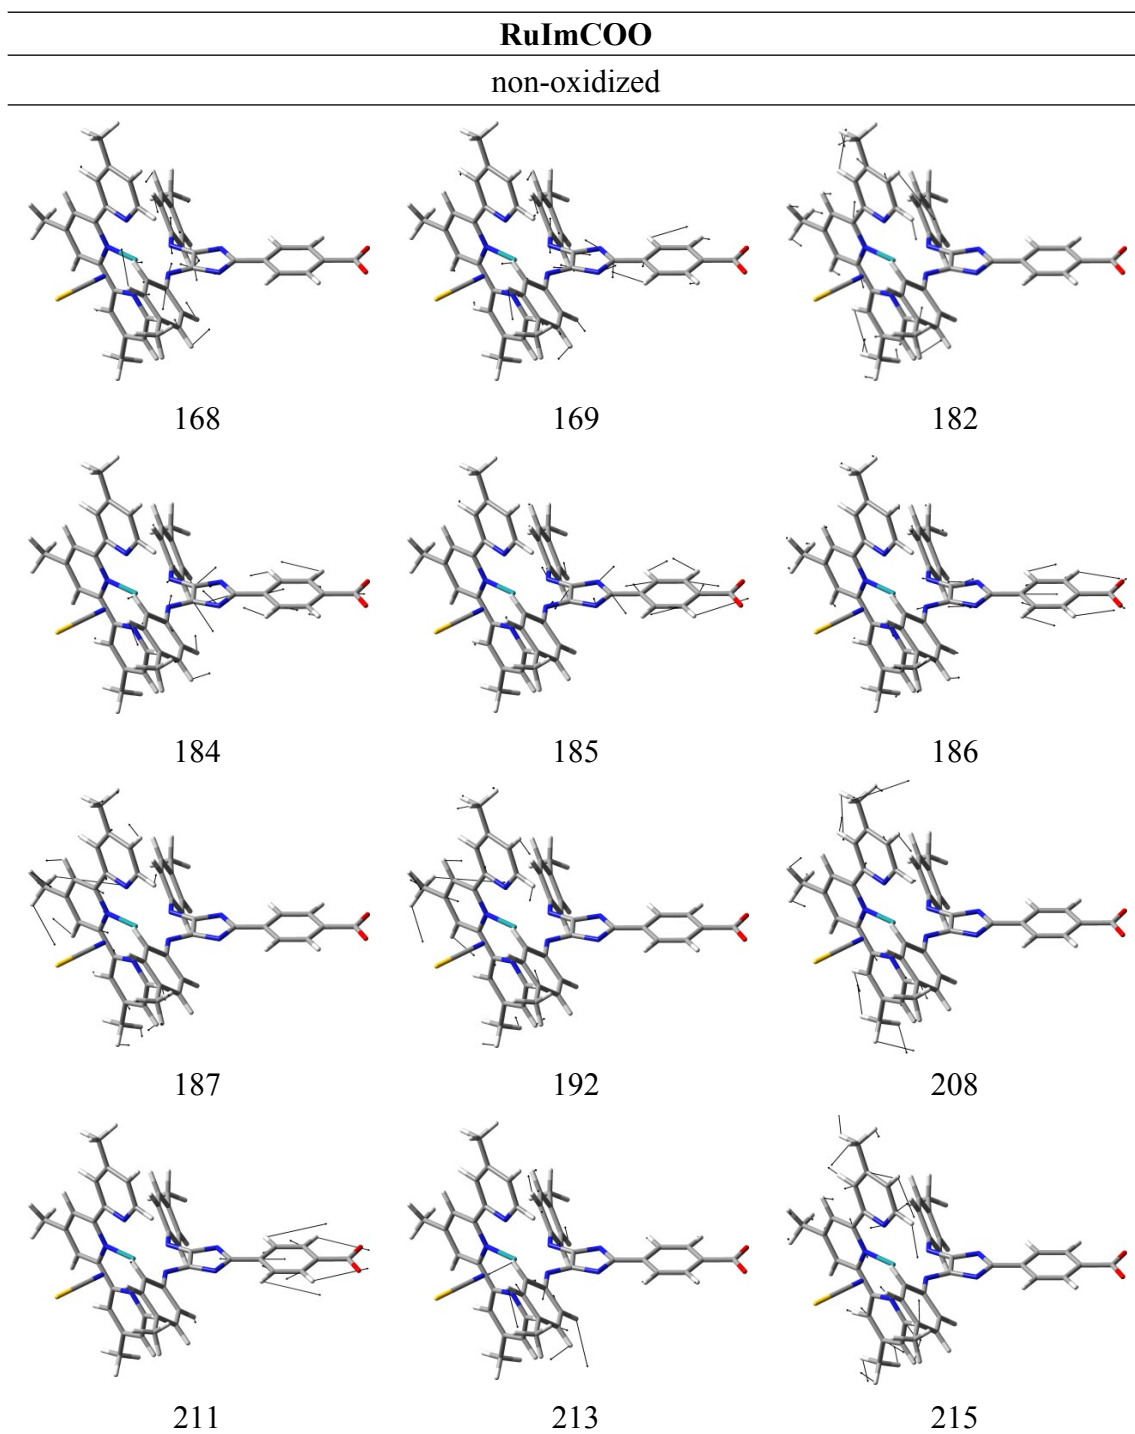

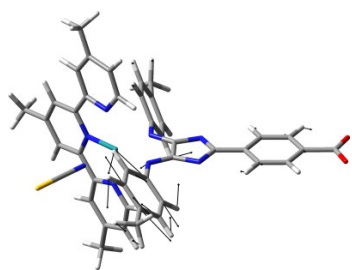

218

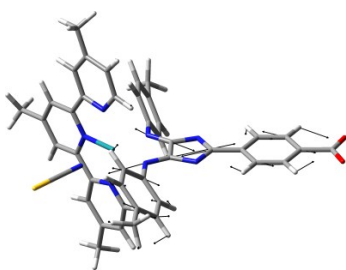

220

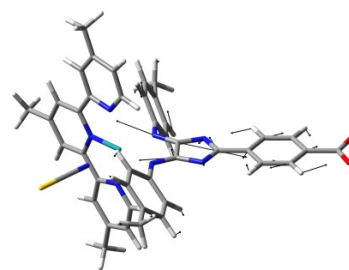

221

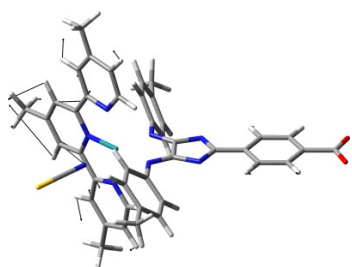

223

---

single oxidized

---

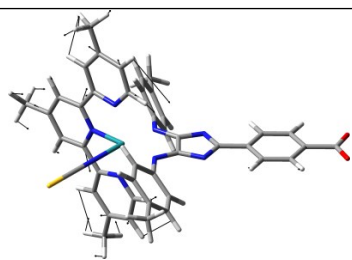

182

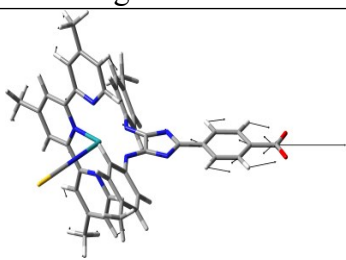

183

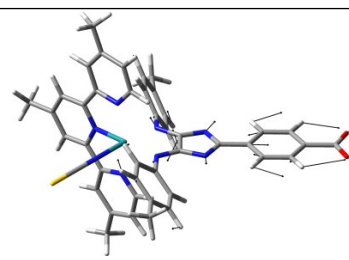

185

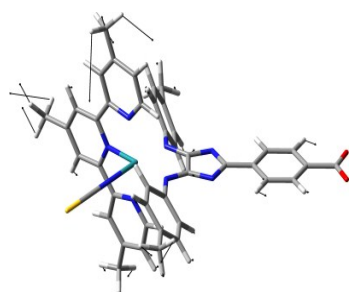

188

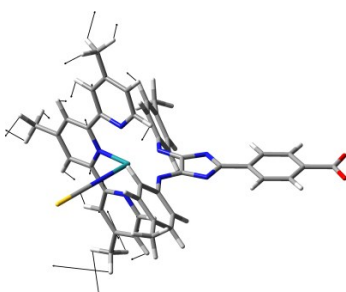

208

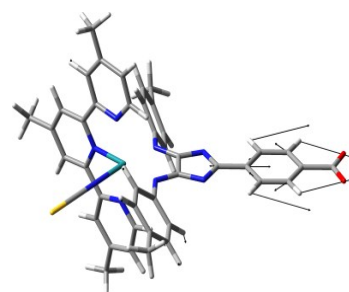

210

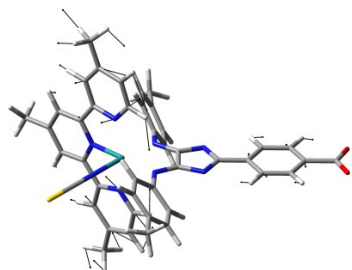

216

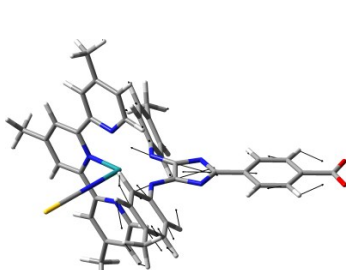

219

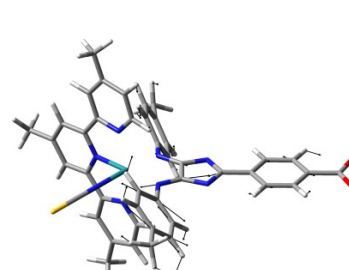

220

---
